# Supplementary material for: Magnetic-Assisted Cell Alignment within a Magnetic Nanoparticle-Decorated Reduced Graphene Oxide/Collagen 3D Nanocomposite Hydrogel
Source: MDPI journal article supplement (doi:10.3390/nano9091293), 2019-09-10
Supplement: s1 [file s1]

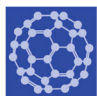

## Article

# Magnetic-Assisted Cell Alignment within a Magnetic Nanoparticle-Decorated Reduced Graphene Oxide/ Collagen 3D Nanocomposite Hydrogel

Malles Shanthosh <sup>1,†</sup>, Jin-Ha Choi <sup>2,†</sup> and Jeong-Woo Choi <sup>1,2,\*</sup>

<sup>1</sup> Center for Integrated Biotechnology, Sogang University, 35 Baekbeom-ro (Sinsu-dong), Mapo-gu, Seoul 121-742, Korea; santhosh@sogang.ac.kr

<sup>2</sup> Department of Chemical and Biomolecular Engineering, Sogang University, 35 Baekbeom-ro (Sinsu-dong), Mapo-gu, Seoul 121-742, Korea; jinhachoi@sogang.ac.kr

\* Correspondence: jwchoi@sogang.ac.kr; Tel.: (+82) 2-705-8480; Fax: (+82) 2-718-1976

† These authors contributed equally to this work.

Received: 23 July 2019; Accepted: 8 September 2019; Published: 10 September 2019

A Electron Image 2

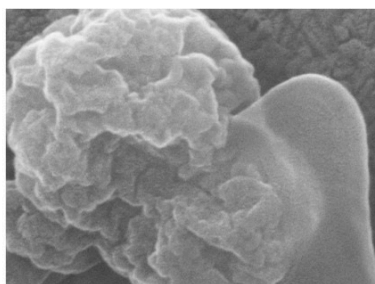

250nm

B EDS Layered Image 2

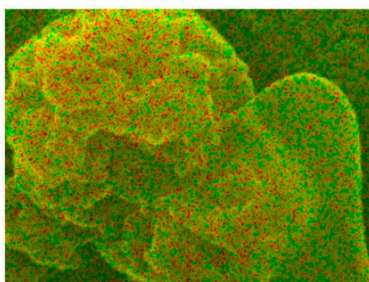

250nm

C

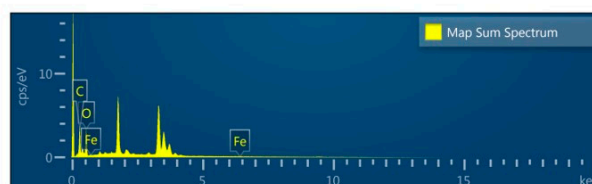

D

| Element | Apparent Concentration | k Ratio | Wt%    | Wt% Sigma | Atomic % |
|---------|------------------------|---------|--------|-----------|----------|
| C       | 0.78                   | 0.00783 | 47.75  | 0.70      | 54.90    |
| O       | 1.49                   | 0.00503 | 52.25  | 0.70      | 45.10    |
| Fe      | 0.00                   | 0.00000 | 0.00   | 0.37      | 0.00     |
| Total:  |                        |         | 100.00 |           | 100.00   |

Figure S1. FESEM and EDS analysis of GO.

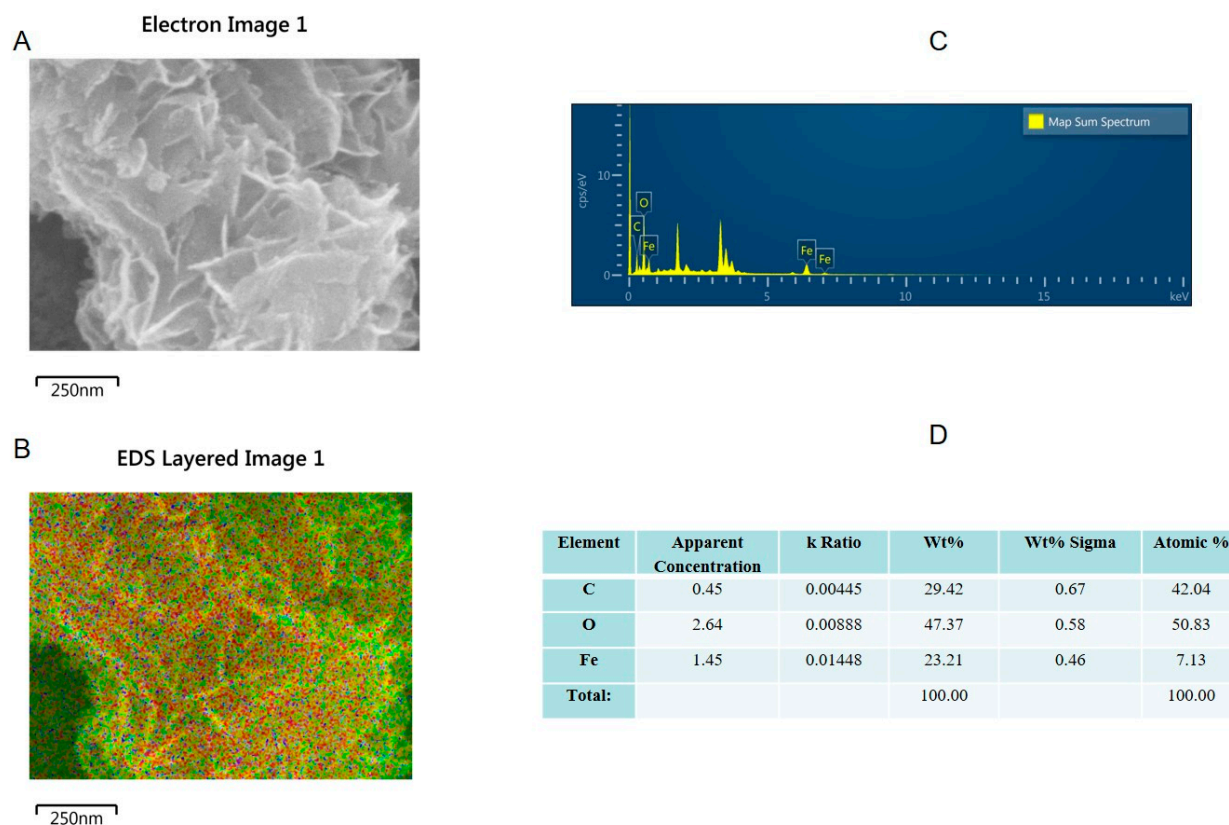

Figure S2. FESEM and EDS analysis of m-rGO nanocomposite.

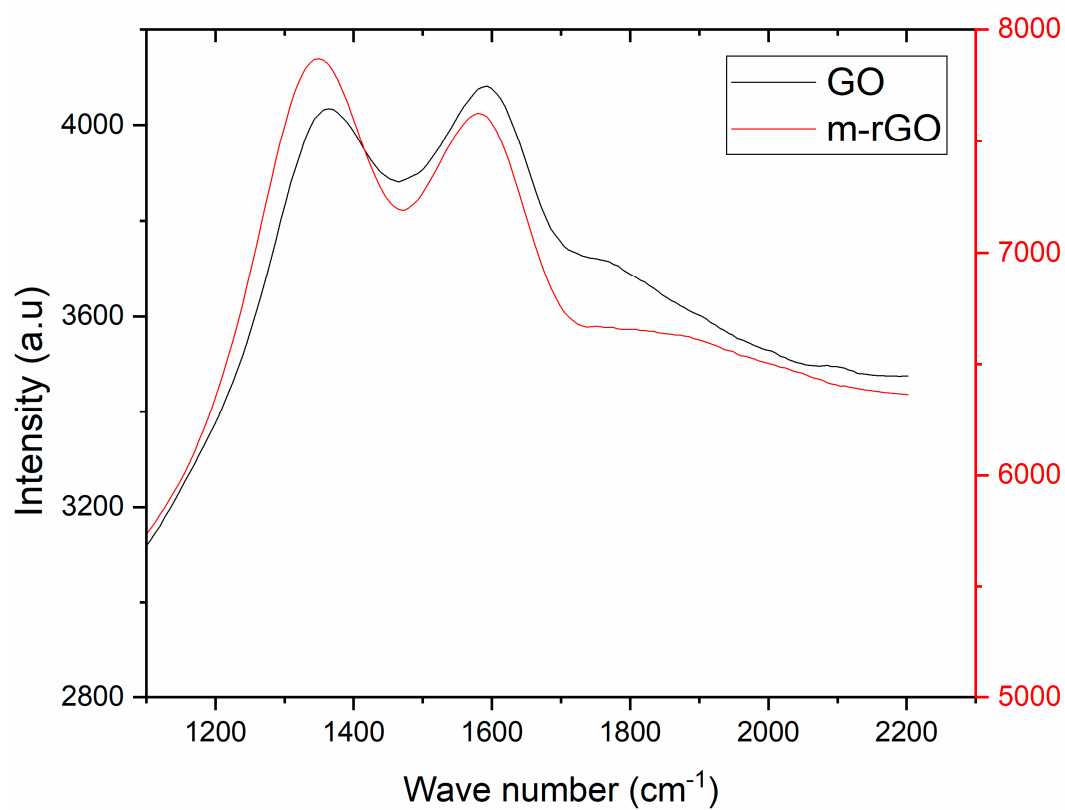

Figure S3. Raman spectra of GO and m-rGO.

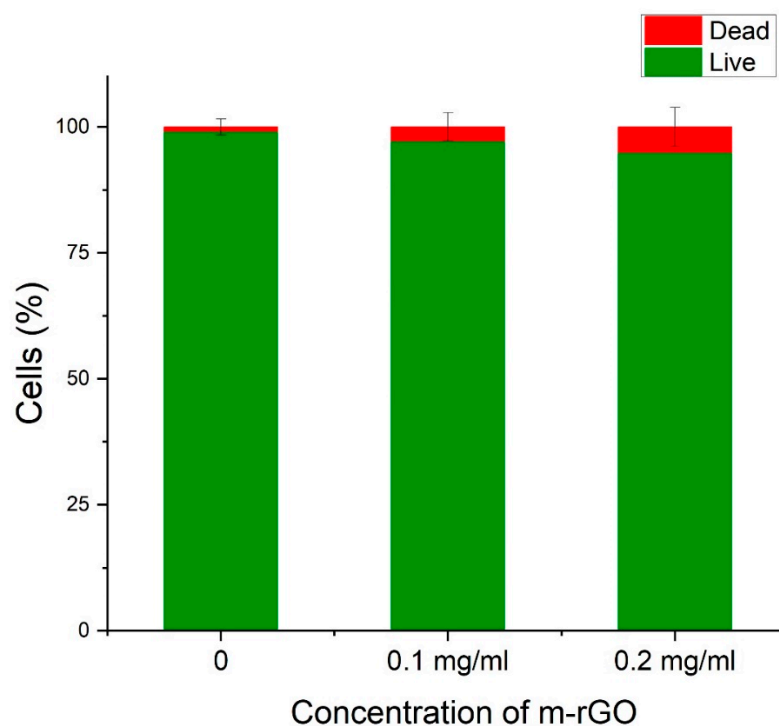

**Figure S4.** Quantification of Live/dead cell assay at different concentration of m-rGO.

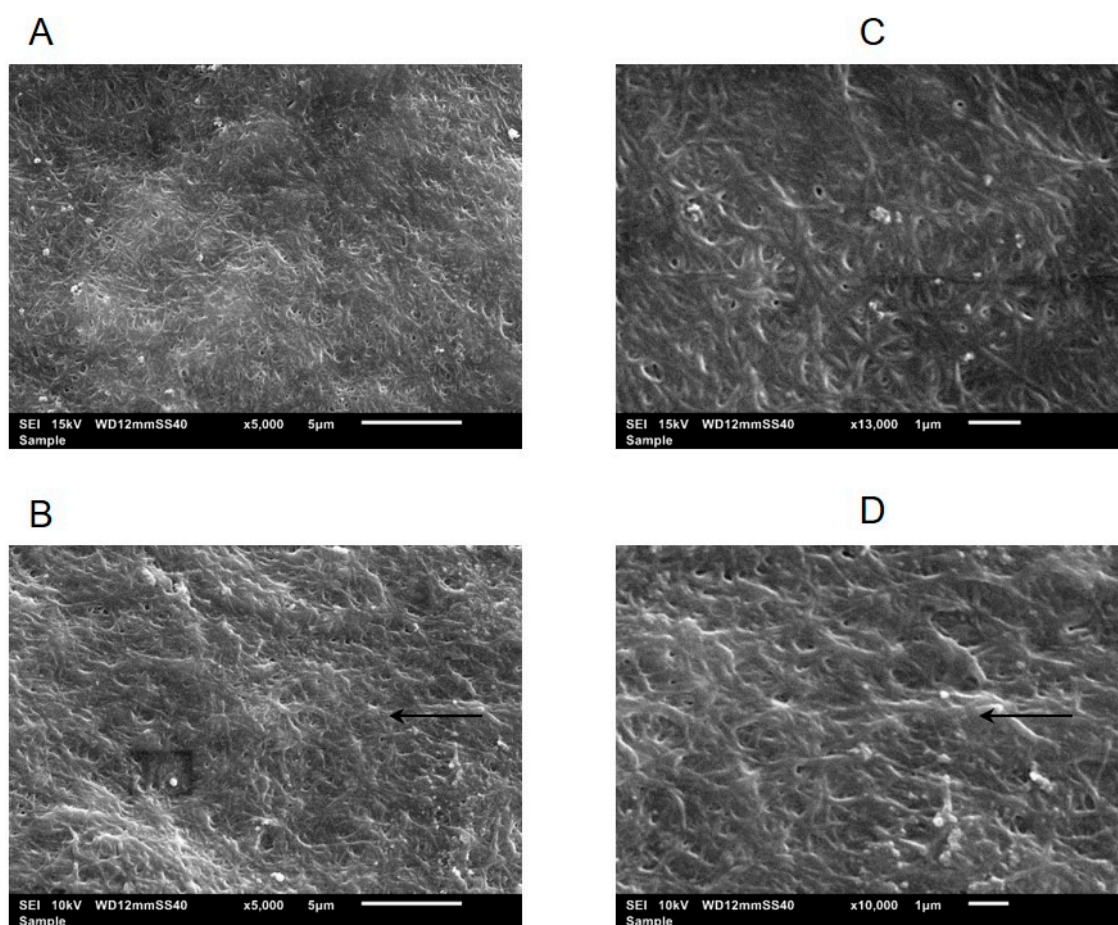

**Figure S5.** Scanning electron microscope images of randomly oriented (A and C) and aligned collagen fibers (B and D).

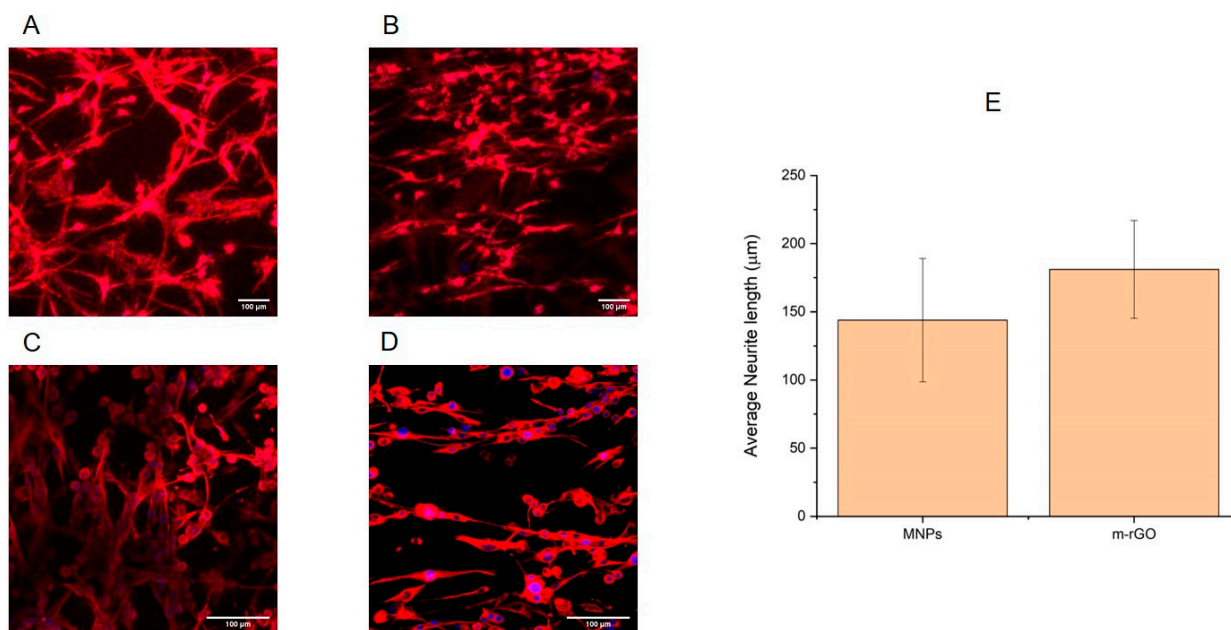

**Figure S6.** Cell morphology of SH-SY5Y cells within random (A and B) and aligned scaffold (C and D) of MNP-Collagen and m-rGO collagen scaffold respectively. E) Average neurite length of SH-SY5Y cells.

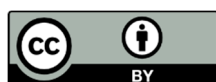

© 2019 by the authors. Licensee MDPI, Basel, Switzerland. This article is an open access article distributed under the terms and conditions of the Creative Commons Attribution (CC BY) license (<http://creativecommons.org/licenses/by/4.0/>).
